# Supplementary material for: Efficient and irreversible capture of strontium ions from aqueous solution using metal–organic frameworks with ion trapping groups
Source: Royal Society of Chemistry journal article supplement (doi:10.1039/c9dt00434c), 2019-01-01
Supplement: c9dt00434c1.pdf [file c9dt00434c1.pdf]

## Supporting information

### **Efficient and Irreversible capture of radioactive strontium ions from nuclear wastewater using metal-organic Frameworks with ion trap group.**

Wanjun Mu, Shenzhen Du, Xingliang Li, Qianhong Yu, Rui Hu, Hongyuan Wei, Yuchuan Yang\*, Shuming Peng\*

*Institute of Nuclear Physics and Chemistry, China Academy of Engineering Physics,*

*64# Mianshan Road, Mianyang, 621900, Sichuan Province, P. R. China*

Corresponding author: Yuchuan Yang, Shuming Peng

Fax: 86+08162484278

Tel: 86+08162494854

Email address: muwj2014@163.com, shuming@caep.cn

## Figure caption

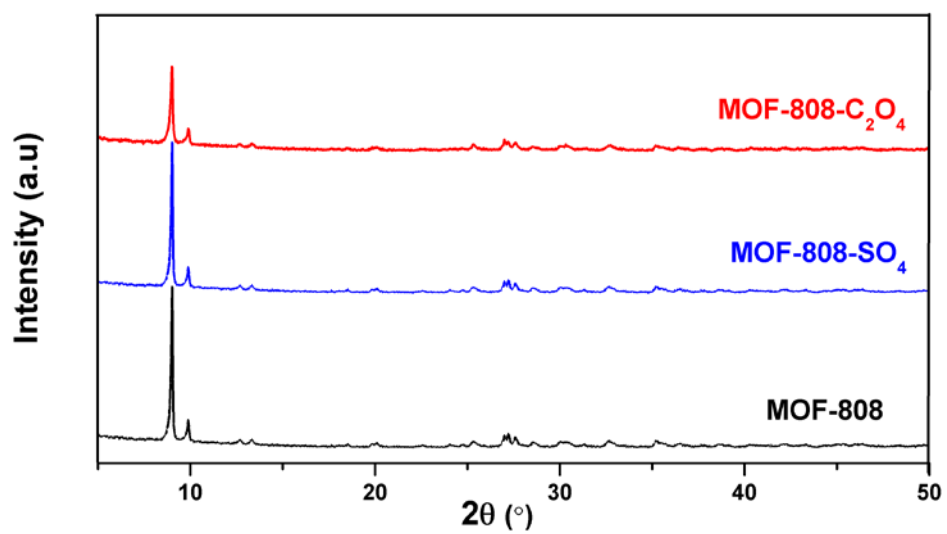

Fig.S1 XRD patterns of MOF-808, MOF-808-SO<sub>4</sub> and MOF-808-C<sub>2</sub>O<sub>4</sub> samples  
after soaking in acidic solution for 24h

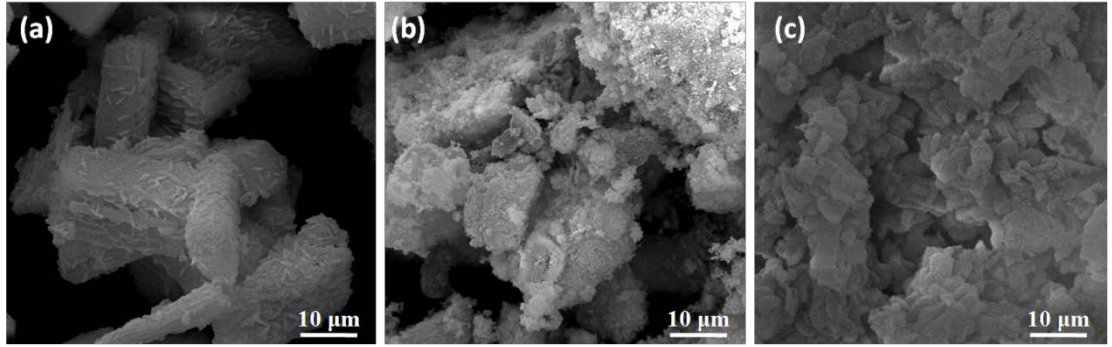

Fig.S2 SEM images of MOF-808, MOF-808-SO<sub>4</sub> and MOF-808-C<sub>2</sub>O<sub>4</sub> samples  
after soaking in acidic solution for 24h

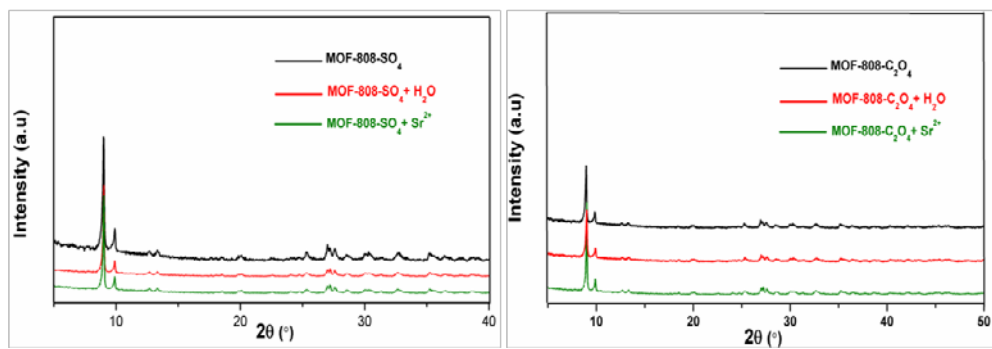

Fig.S3 XRD patterns of MOF-808-SO<sub>4</sub> and MOF-808-C<sub>2</sub>O<sub>4</sub> after immersing in water / strontium solution.

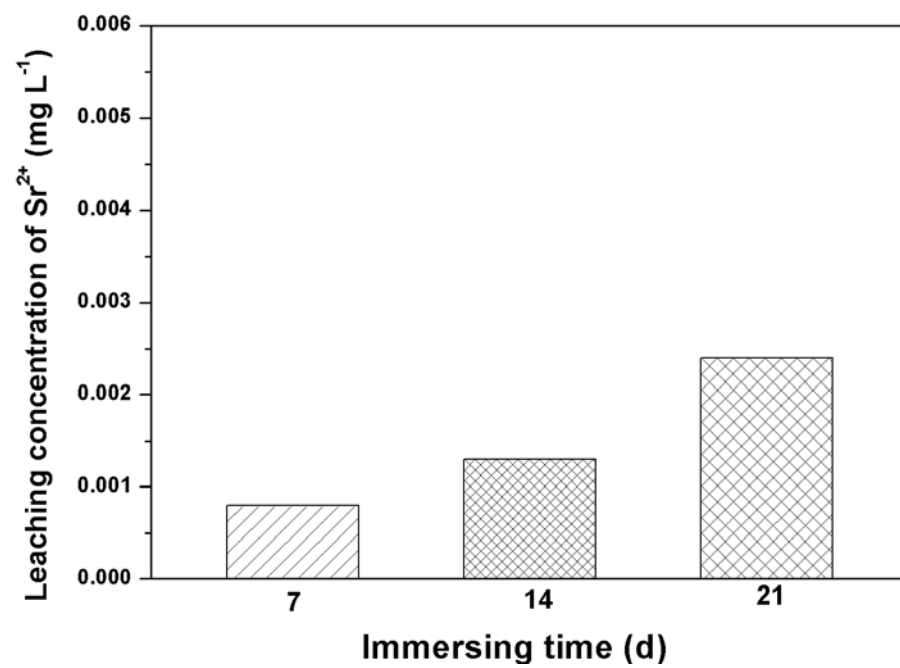

Fig.S4 Sr<sup>2+</sup> ions concentration of solution after immersing of MOF-808

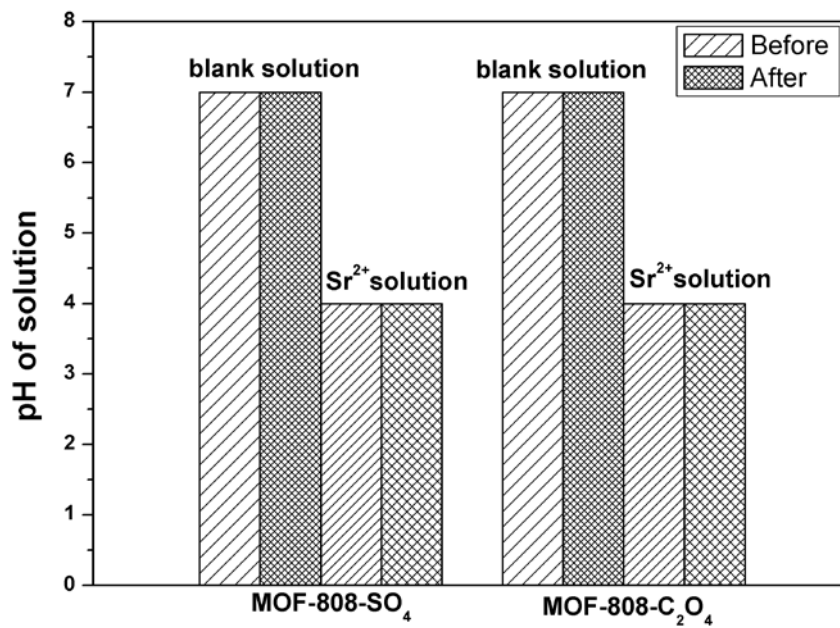

Fig.S5 Solution pH values before and after immersing

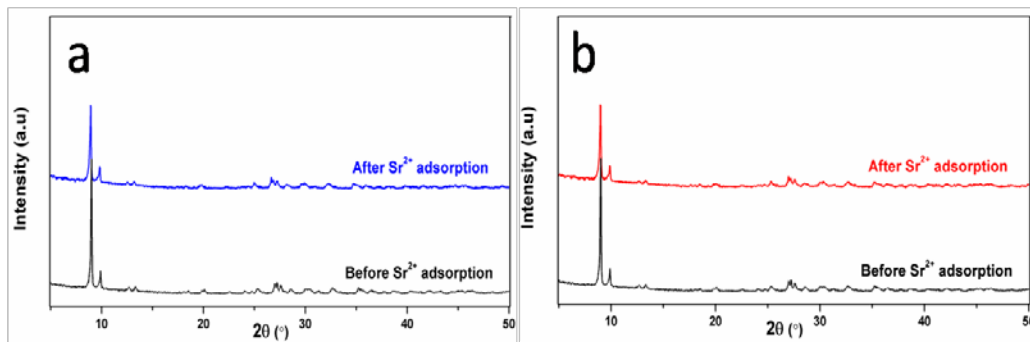

Fig.S6 XRD patterns of (a) MOF-808-SO<sub>4</sub> and (b) MOF-808-C<sub>2</sub>O<sub>4</sub> before and after adsorption of Sr<sup>2+</sup> ions

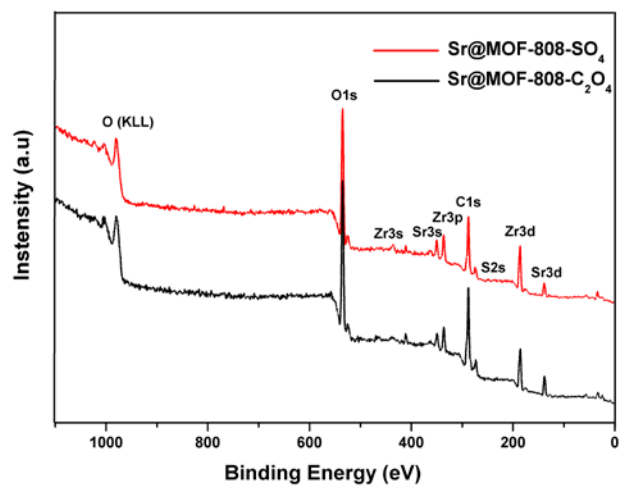

Fig.S7 XPS spectrum of MOF-808-SO<sub>4</sub> and (b) MOF-808-C<sub>2</sub>O<sub>4</sub> after adsorption of Sr<sup>2+</sup> ions



## Table caption

Table.S1 Equilibrium isotherm model parameters for Sr<sup>2+</sup> adsorption on MOFs samples

| Adsorbent                             | Langmuir isotherm                    |                         |                | Freundlich isotherm |                                                            |                |
|---------------------------------------|--------------------------------------|-------------------------|----------------|---------------------|------------------------------------------------------------|----------------|
|                                       | q <sub>m</sub> (mg g <sup>-1</sup> ) | b (L mg <sup>-1</sup> ) | R <sup>2</sup> | n                   | k <sub>f</sub> [mg g <sup>-1</sup> (L/ g) <sup>1/n</sup> ] | R <sup>2</sup> |
| MOF-808                               | 72.65                                | 0.0183                  | 0.9982         | 1.782               | 2.664                                                      | 0.9321         |
| MOF-808-SO <sub>4</sub>               | 174.62                               | 0.0651                  | 0.9987         | 2.217               | 5.824                                                      | 0.9624         |
| MOF-808-C <sub>2</sub> O <sub>4</sub> | 206.34                               | 0.1225                  | 0.9996         | 1.632               | 3.238                                                      | 0.9718         |

Table.S2 kinetic parameters for Sr<sup>2+</sup> sorption onto MOF-808 materials (T=298 K)

| Model                       | Parameters                                    | MOF    | MOF-808-SO <sub>4</sub> | MOF-808-C <sub>2</sub> O <sub>4</sub> |
|-----------------------------|-----------------------------------------------|--------|-------------------------|---------------------------------------|
| Experiment                  | $q_e$ (mg g <sup>-1</sup> )                   | 72.48  | 174.46                  | 204.48                                |
| Pseudo first-order kinetic  | $k_1$ (min <sup>-1</sup> )                    | 0.0123 | 0.0236                  | 0.0458                                |
| model                       | $q_e^{cal}$ (mg g <sup>-1</sup> )             | 71.62  | 174.42                  | 203.2                                 |
|                             | R <sup>2</sup>                                | 0.8763 | 0.9236                  | 0.9346                                |
| Pseudo second-order kinetic | $k_2$ (g mg <sup>-1</sup> min <sup>-1</sup> ) | 0.0018 | 0.0056                  | 0.0055                                |
| model                       | $q_e^{cal}$ (mg g <sup>-1</sup> )             | 72.48  | 174.53                  | 204.32                                |
|                             | R <sup>2</sup>                                | 0.9937 | 0.9946                  | 0.9978                                |
